# Supplementary material
Source: MDPI journal article supplement (https://www.mdpi.com/2075-163X/12/9/1079)

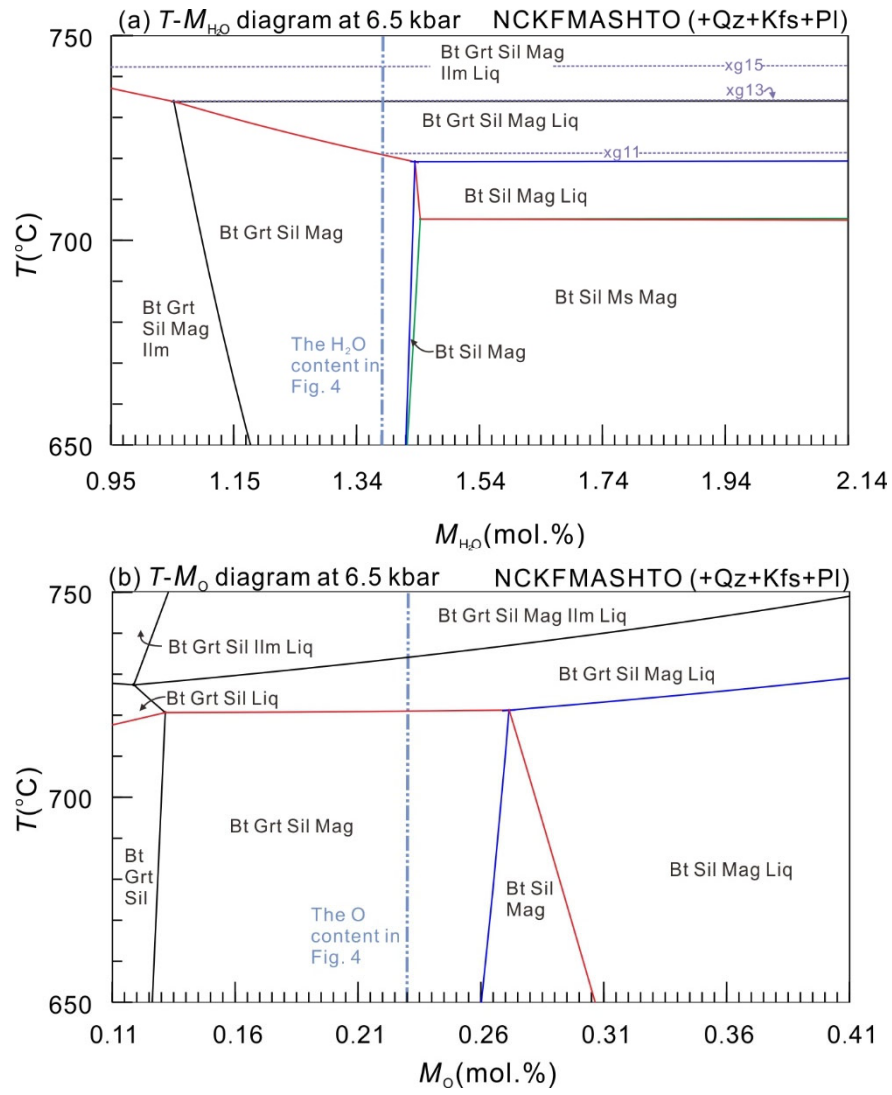

Figure S1. (a)  $T$ - $M$  ( $\text{H}_2\text{O}$ ) and (b)  $T$ - $M$  ( $\text{O}$ ) diagrams at 6.5 kbar

Supplement: s1 [file s1]
